# Supplementary material for: Greenland records of aerosol source and atmospheric lifetime changes from the Eemian to the Holocene
Source: PubMed Central journal article supplement (PMC5902614; doi:10.1038/s41467-018-03924-3), 2018-04-16
Supplement: 41467_2018_3924_MOESM2_ESM.pdf [file 41467_2018_3924_MOESM2_ESM.pdf]

## **Description of Additional Supplementary Files**

File Name: Supplementary Data 1

Description: NEEM ion concentration data in 10 yr resolution.

File Name: Supplementary Data 2

Description: Aerosol source concentrations and atmospheric lifetime in 10 yr resolution derived from the NEEM ice core data.
